# Supplementary material for: A Guide of Indicators Creation for Critical Infrastructures Resilience. Based on a Multi-criteria Framework Focusing on Optimisation Actions for Road Transport System
Source: Copernicus journal article supplement (doi:10.5194/egusphere-2024-204), 2024-01-26
Supplement: Supplementary file [file egusphere-2024-204-AC3-supplement.pdf]

|                                                           |                                                                                                                                                                                                                                                                                                                                                                                                                                                                                                                                                                                                                                                                                                                                                                                                                                                                                                                                                                                                                                                                                                                                                                                                                                                                                                                                                                                                                                                                                                                                                                                                                                                                                                                                                                                                                                                                                                                                       |
|-----------------------------------------------------------|---------------------------------------------------------------------------------------------------------------------------------------------------------------------------------------------------------------------------------------------------------------------------------------------------------------------------------------------------------------------------------------------------------------------------------------------------------------------------------------------------------------------------------------------------------------------------------------------------------------------------------------------------------------------------------------------------------------------------------------------------------------------------------------------------------------------------------------------------------------------------------------------------------------------------------------------------------------------------------------------------------------------------------------------------------------------------------------------------------------------------------------------------------------------------------------------------------------------------------------------------------------------------------------------------------------------------------------------------------------------------------------------------------------------------------------------------------------------------------------------------------------------------------------------------------------------------------------------------------------------------------------------------------------------------------------------------------------------------------------------------------------------------------------------------------------------------------------------------------------------------------------------------------------------------------------|
| <b>Comment</b>                                            | A suggestion is to clarify how the author's work benefits from and differs from existing related studies in the Introduction Section.                                                                                                                                                                                                                                                                                                                                                                                                                                                                                                                                                                                                                                                                                                                                                                                                                                                                                                                                                                                                                                                                                                                                                                                                                                                                                                                                                                                                                                                                                                                                                                                                                                                                                                                                                                                                 |
| <b>Reply</b>                                              | The presented study aims to meet one current requirement for the indicators-based resilience assessment in practical management: a guide for indicator systems building. Despite the existence of a large number of resilience assessment indicators, very little research develops guidance to help managers create specific indicators themselves. However, indeed, we did not point out how this presented study differs from other available research. Therefore, we have added this part as you suggested, and please find the detailed revisions in the attached document (revision 3). All your comments are in green and all highlight revisions are in red.                                                                                                                                                                                                                                                                                                                                                                                                                                                                                                                                                                                                                                                                                                                                                                                                                                                                                                                                                                                                                                                                                                                                                                                                                                                                  |
| <b>Revision</b><br><br><b>Section 1:<br/>introduction</b> | A single indicator can rarely provide useful information. To generate increasingly precise information on conditions, the assessment designed for a complex system could rely on indicator systems (Shavelson et al., 1990). An indicator system should contain numerous specific indicators that are associated with concrete conditions, requirements, or situations. These specific indicators could not be set without consideration of the realities of each particular studied case. Thus, it necessitates practical tools that enable CIs managers to set their specific indicator system for their particular studied case, without providing directly pre-defined indicators. As argued by Shavelson et al. (1991) "no indicator system could accommodate all of the potential indicators identified by a comprehensive process and remain manageable". A desirable hazard-related indicators tool should be simple and flexible, adapting itself to different case studies and different kinds of users (Barroca et al. 2016). <b>Even though existing CIs resilience assessments by indicators are diverse and multidisciplinary, few tools exist for guiding CIs managers build specific indicator systems in regarding realities. For example, Yang et al. (2023, a) review 68 scientific papers relating to indicators-based assessments for CIs resilience. Several papers reviewed by Yang et al. (2023, a) present assessments based on a large number of systemic indicators: Fisher et al. (2010), Hromada and Lukas (2012), Petit et al. (2013), Bialas (2016), Upadhyaya et al. (2018), De Vivo et al. (2022). However, all these papers directly show the suggested indicators without describing the detailed steps to set them. Therefore, the main objective of this study is to provide a guide for CIs managers to enable them to build specific indicator systems for their particular studied cases.</b> |
